# Supplementary material for: A functional oligonucleotide probe from an encapsulated silver nanocluster assembled by rolling circle amplification and its application in label-free sensors
Source: Royal Society of Chemistry journal article supplement (doi:10.1039/c6ra18257g), 2016-01-01
Supplement: c6ra18257g1.pdf [file c6ra18257g1.pdf]

## Electronic Supplementary Information

### Functional Oligonucleotide Probe Encapsulated Silver Nanocluster

### Assembled by Rolling Circle Amplification and Their Application in Label-

### Free Sensor

*Yuna Guo<sup>a</sup>, Yu Wang<sup>b</sup>, Su Liu<sup>c</sup>, Jinghua Yu<sup>a</sup>, Qianqian Pei<sup>a</sup>, Xueqi Leng<sup>c</sup>, Jiadong Huang<sup>a,b\*</sup>*

<sup>a</sup> Key Laboratory of Chemical Sensing & Analysis in Universities of Shandong, School of Chemistry and Chemical Engineering, University of Jinan, Jinan 250022, P.R. China

<sup>b</sup> College of Biological Sciences and Technology, University of Jinan, Jinan 250022, P.R. China

<sup>c</sup> College of Resources and Environment, University of Jinan, Jinan 250022, P.R. China

\* Corresponding author. E-mail: chm\_huangjd@ujn.edu.cn; Tel.: +86-531-89736122; Fax: +86-531- 82769122.

## 2. Experimental

**Table S1** DNA oligonucleotides sequence used in this work. the underlined letters is the aptamer sequences of *E. coli* O157:H7. **P** in the padlock probe represents phosphate at the 5' end.

| Oligonucleotide name | sequence (5' to 3') description                                                                                                             |
|----------------------|---------------------------------------------------------------------------------------------------------------------------------------------|
| aptamer-primer probe | <u>GCAATGGTACGGTACTTCCACTTAGGTCGAGGTTAGTTTGTCTTGCTGGCGCA</u><br><u>TCCACTGAGCGCAAAGTGCACGCTACTTTGCTAA</u> TTTTTTTTTTTGTACATGG<br>CGGCATTACT |
| padlock probe        | <b>P-</b><br>CCATGTACATTTTTTTTCTTGTTTCCTTTCCTTGTTTTTTTTTTTTTCTTGTTTCC<br>TTTCCTTGTTTTTAGTAATGCCG                                            |
| ligation probe       | ATGTACATGGCGGCATTACT                                                                                                                        |
| FOP 1                | TTCTTGTTTCCTTTCCTTGTTTTTCCCTTAATCCCC                                                                                                        |
| FOP 2                | TTCTTGTTTCCTTTCCTTGTTTTTCCCCCCCCCCCC                                                                                                        |
| FOP 3                | TTCTTGTTTCCTTTCCTTGTTTTTCCCTTAATCCCC                                                                                                        |
| FOP 4                | TTCTTGTTTCCTTTCCTTGTTTTTCCC TTC CTT CCT TCC AAC CAA CCC ATC<br>CCA TTC TGC AGC                                                              |
| FOP5                 | TTCTTGTTTCCTTTCCTTGTTTTTACCCGAACCTGGGCTACCACCCTTAATCCC<br>CAATCC GTCGAGCAGAGTT                                                              |

### 2.2. Apparatus

Fluorescence spectra were obtained with a RF-5301PC spectrophotometer (Shimadzu, Japan) equipped with a 150 W xenon lamp (Ushio Inc., Japan). Morphology observation of AgNCs and self-assembled AgNCs in PB buffer (pH 7.0, 20 mM) was carried via transmission electron microscopy (TEM; JEM-2100 microscope) at an acceleration voltage of 200 kV. Gel electrophoresis was conducted using DYCZ-24DN electrophoresis cell (LIUYI, Beijing, China) and Bio-Rad Gel imaging system (Bio-Rad, USA). Cyclic voltammetry (CV) and differential pulse

voltammetry (DPV) were carried out on a CHI 660D electrochemical workstation (Shanghai Chen Hua Instrument Co. Ltd., China) with a conventional three-electrode system composed of a bare or functionalized Au electrode as the working electrode, a platinum wire as the auxiliary electrode, and a Ag/AgCl reference electrode with saturated KCl solution as the reference electrodes.

## Results and discussion

### *Electrochemical characterization of the modification of the electrode.*

The characterization of the electrode was also conducted by cyclic voltammetry (CV). As shown in Fig. S1, the redox peak current decreased with the modification of the electrode surface with the antibody, *E. coli* O157:H7, PAP, RCA product and AgNCs. This is due to the hindrance of the electrontransfer process of the modified biomacromolecules on the electrode, which is consistent with the observed increases of the  $R_{et}$  in the EIS measurements.

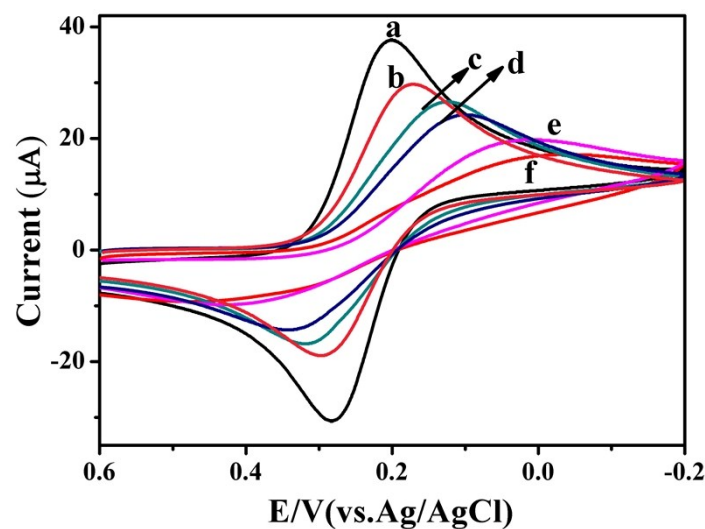

**Fig. S1.** CVs obtained for the bare Au electrode (a), antibody/Au electrode (b), *E. coli* O157:H7/BSA/antibody/Au electrode (c), PAP/*E. coli* O157:H7/BSA/antibody/Au (d), RCA products-linked PAP/*E. coli* O157:H7/BSA/antibody/Au electrode (e), AgNCs/RCA products-linked PAP/*E. coli* O157:H7/BSA/antibody/Au

electrode (f). Measurements were performed in 10 mM PBS (pH 7.4) containing of 0.25 mM KCl and 5.0 mM  $K_3[Fe(CN)_6]$ .

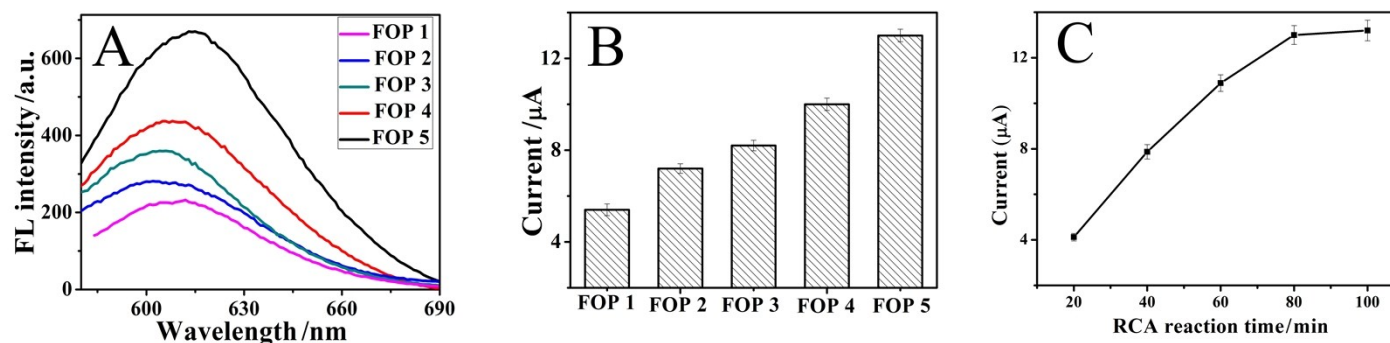

**Fig. S2.** (A) Effect of the FOP sequences on fluorescence intensity of AgNCs. (B) Effect of the FOP sequences on the DPV peak current of biosensor. (C) Effect of reaction time of RCA on the DPV peak current of biosensor.

**Table S3** *E. coli* O157:H7 analysis in synthetic samples.

| Samples      | Spiked amount<br>(cfu mL <sup>-1</sup> ) | Our method<br>(cfu mL <sup>-1</sup> ) | Recovery (%) | plate count method<br>(cfu mL <sup>-1</sup> ) |
|--------------|------------------------------------------|---------------------------------------|--------------|-----------------------------------------------|
| milk samples | $3.7 \times 10^2$                        | $(3.46 \pm 0.15) \times 10^2$         | 93.4         | $3.83 \times 10^2$                            |
|              | $3.7 \times 10^3$                        | $(3.77 \pm 0.21) \times 10^3$         | 101.9        | $3.54 \times 10^3$                            |
|              | $3.7 \times 10^4$                        | $(3.58 \pm 0.17) \times 10^4$         | 96.8         | $3.61 \times 10^4$                            |
|              | $3.7 \times 10^5$                        | $(3.80 \pm 0.13) \times 10^4$         | 102.7        | $3.52 \times 10^4$                            |
